# Supplementary material for: Development of SNP Set for the Marker-Assisted Selection of Guar (Cyamopsis tetragonoloba (L.) Taub.) Based on a Custom Reference Genome Assembly
Source: MDPI journal article supplement (doi:10.3390/plants10102063), 2021-09-30

Supplementary Materials Figure S5. Validation of SNPs and deletions associated with early maturation by PCR and Sanger sequencing

Primer list

| Locus                      | Forward                  | Revers                  | Expected size |
|----------------------------|--------------------------|-------------------------|---------------|
| contig_59:14389378 (gu59)  | AGAACCACACATTCTTGACACTA  | TGGTGGACATCCCTCTCTAA    | 418           |
| contig_229:330388 (gu229)  | CCAAGTGTCAATTCTCCGTTAGT  | GGTCTGATCTGTCGTGCATATAG | 500           |
| contig_88:4931265 (gu88)   | GCGTGGAGTTTGTAGTGGACTATG | GTGCTCTCTCTAAGGCTGAAAC  | 347           |
| contig_182:841660 (gu182)  | GACTCTCCATCATAGGGTTTACTT | AGTCCTGTCTCTCCTGGTAAT   | 550           |
| contig_37:351180 (gu37)    | CGAACAAACGGTCAGCAAATAA   | AAATGAAGCACGTGAAGCTAATC | 553           |
| contig_188:3026232 (gu188) | GCCAGTCCAATAGGCTAACA     | CCTGCCTGACTCAGATAAGAAC  | 638           |

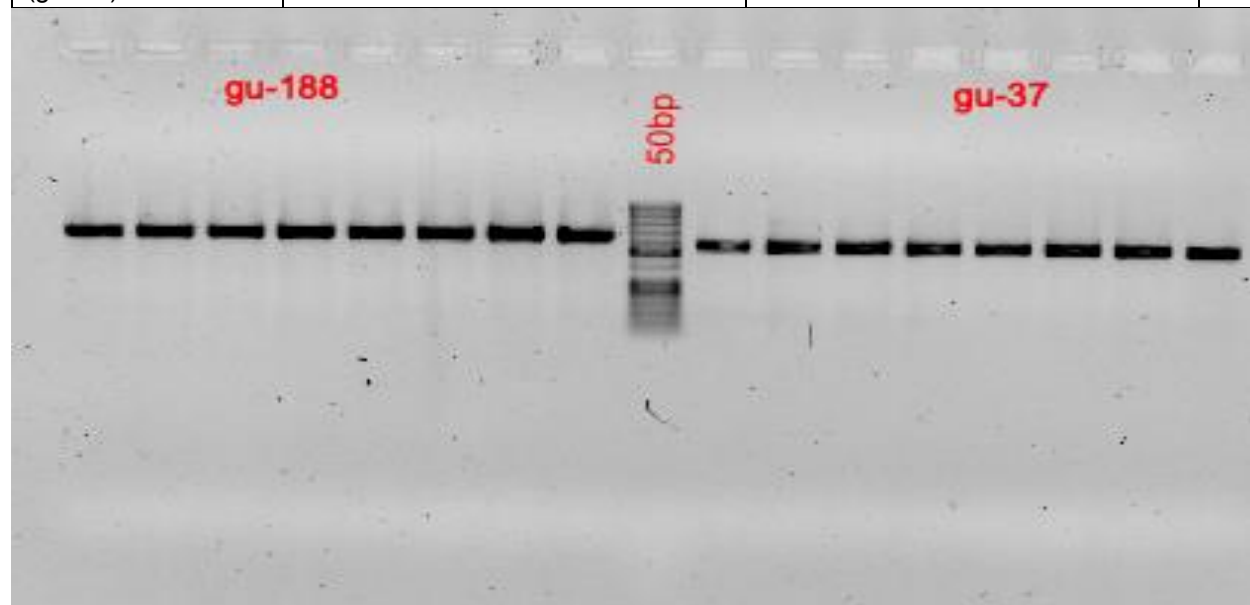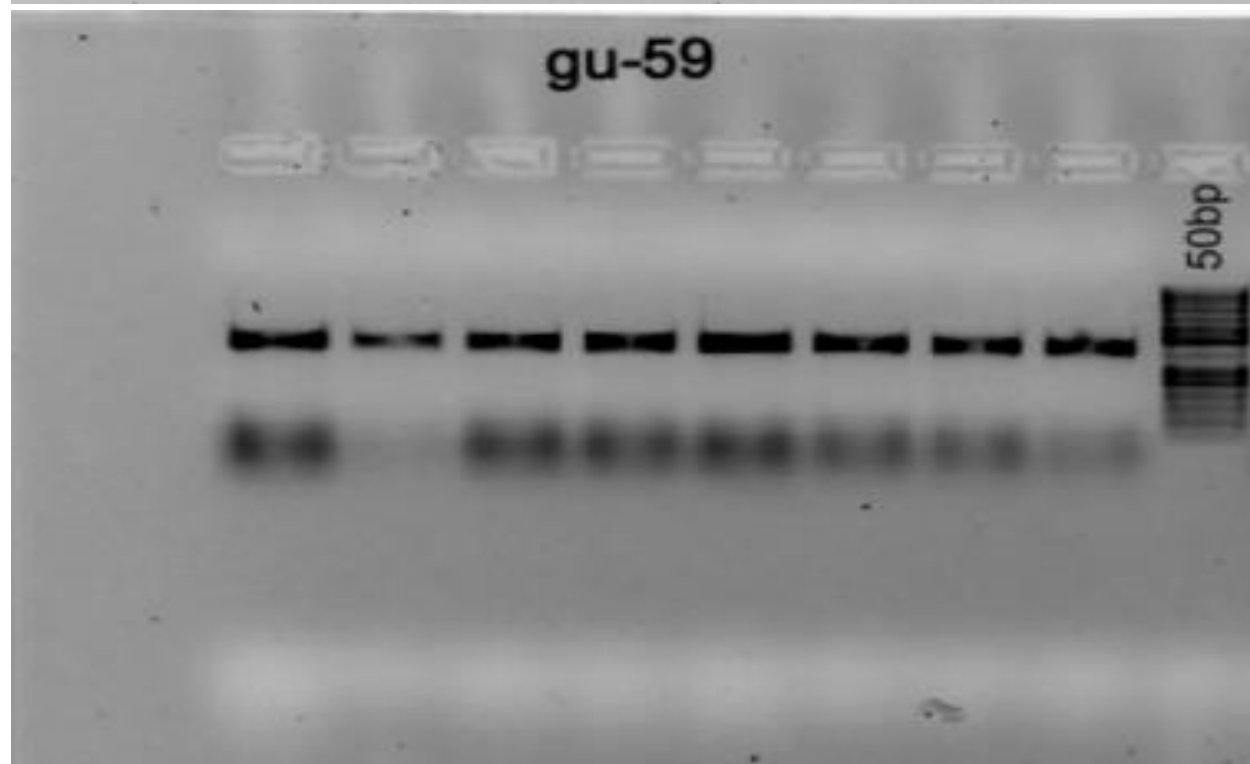

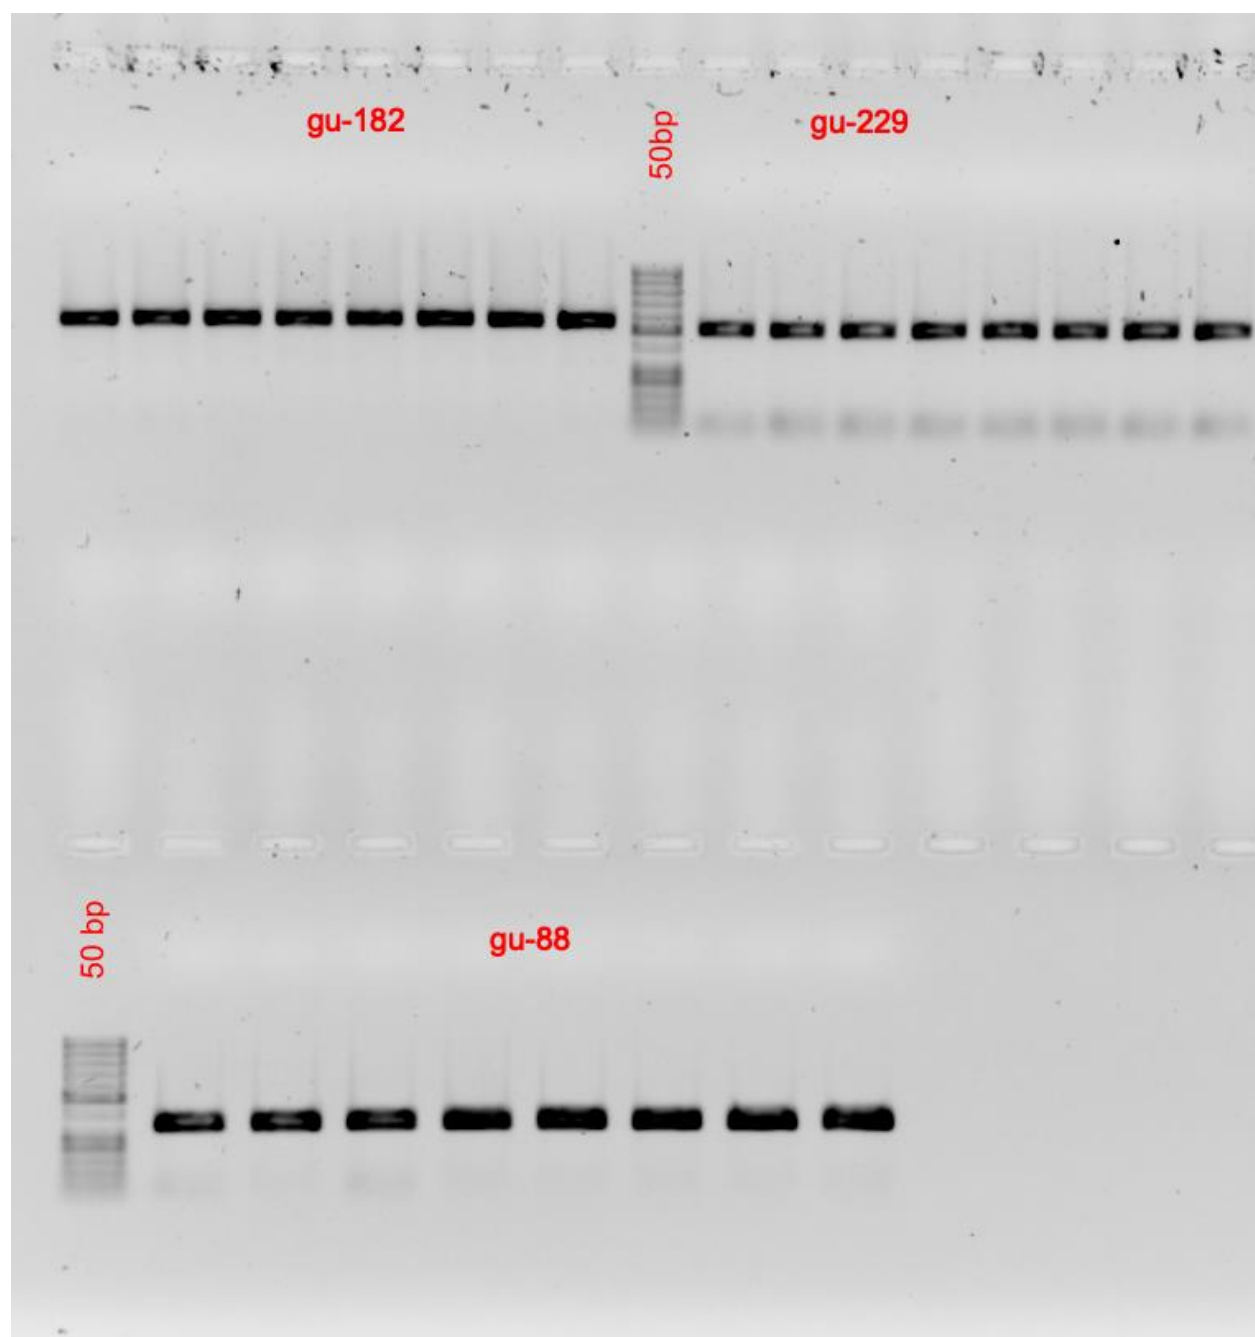

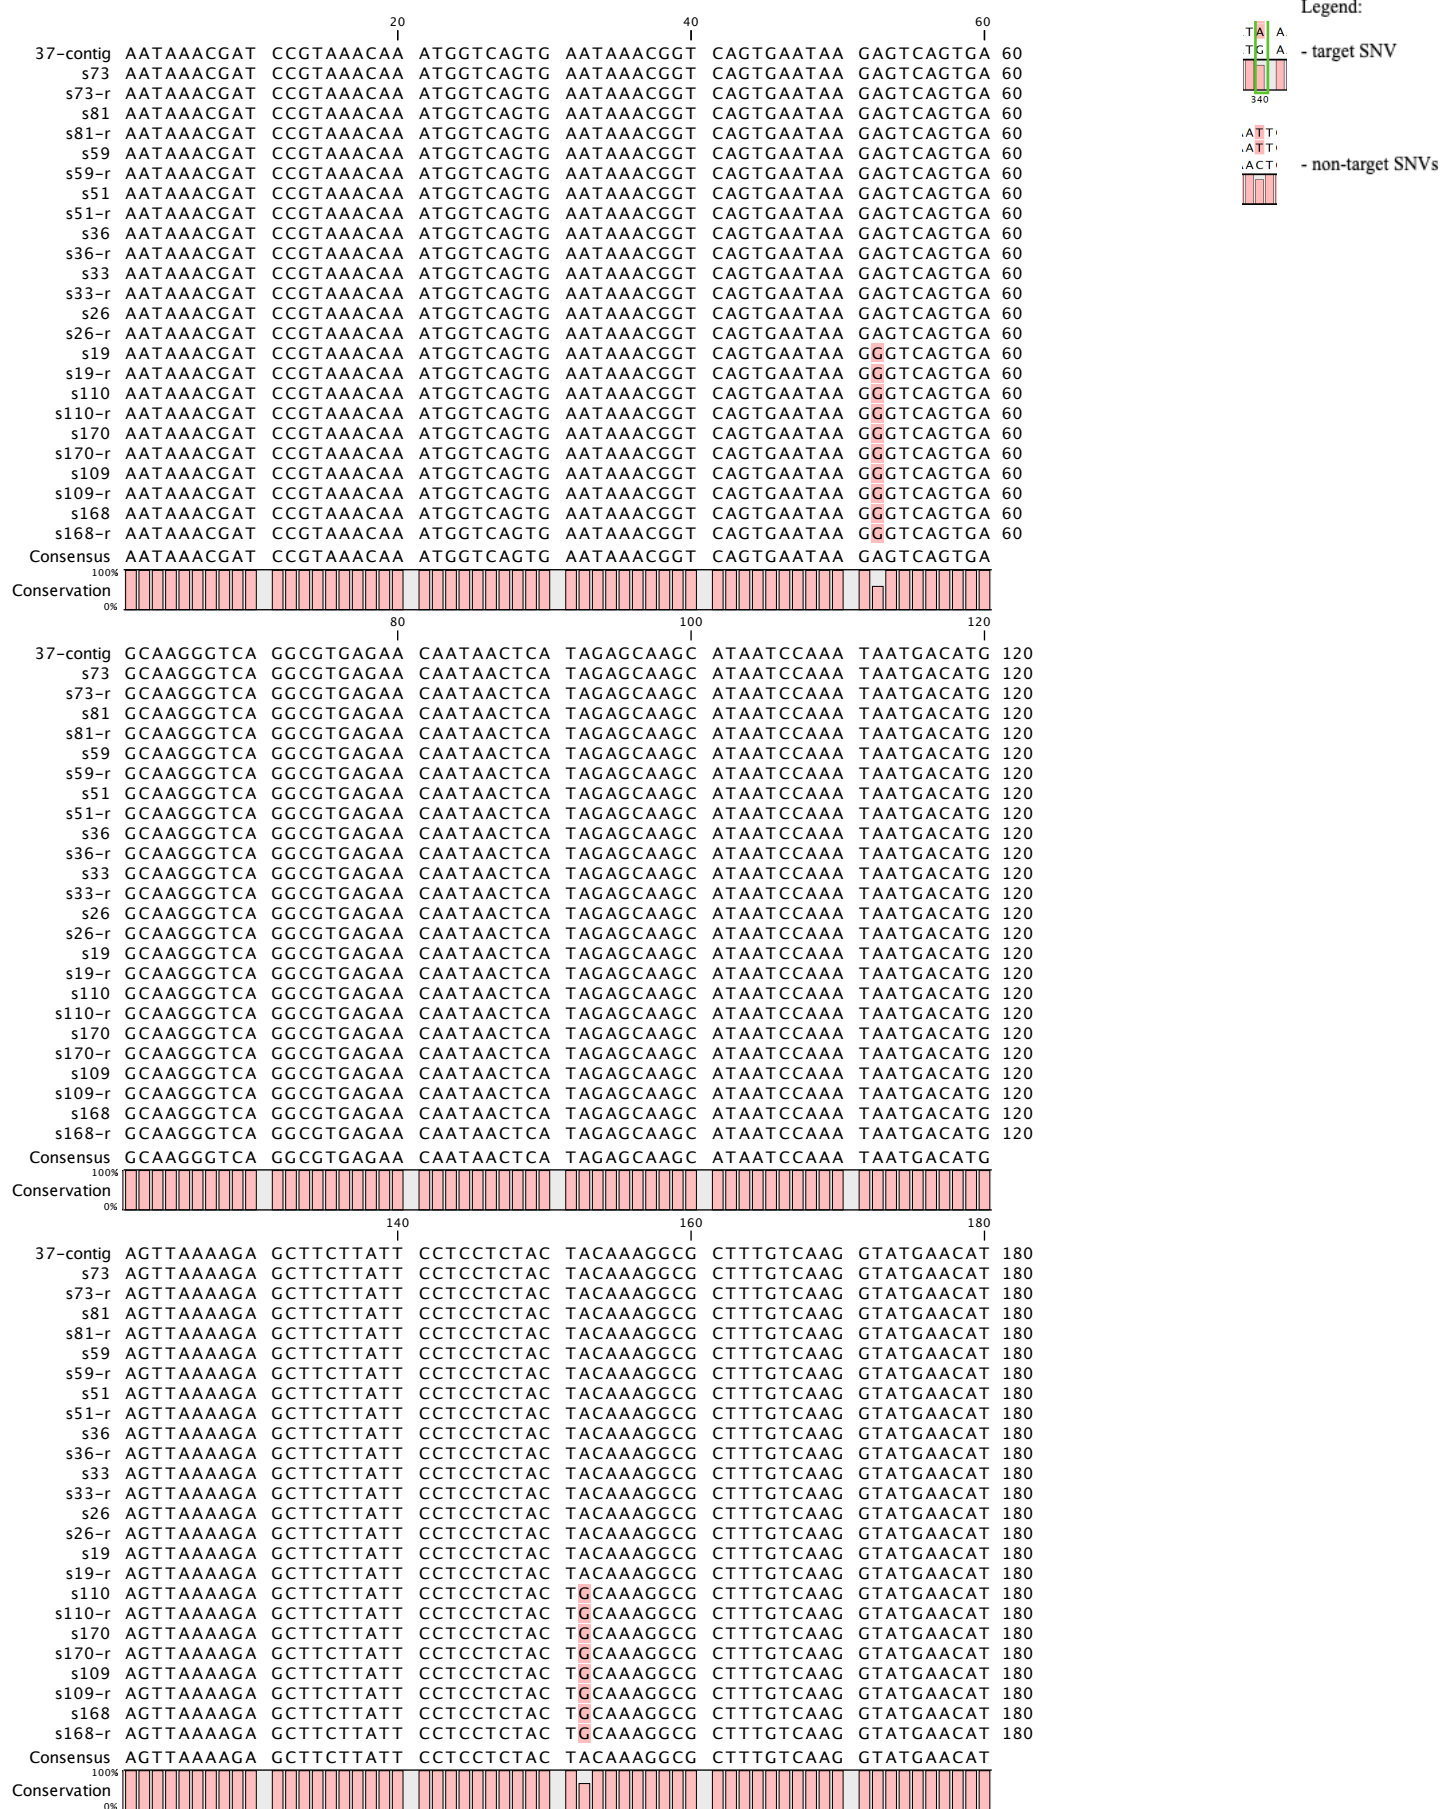



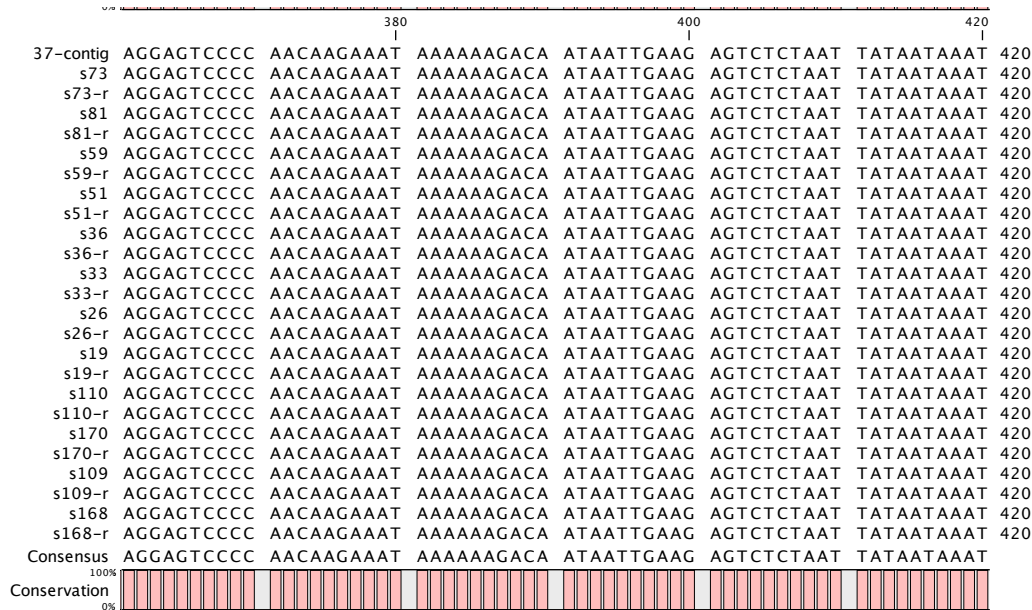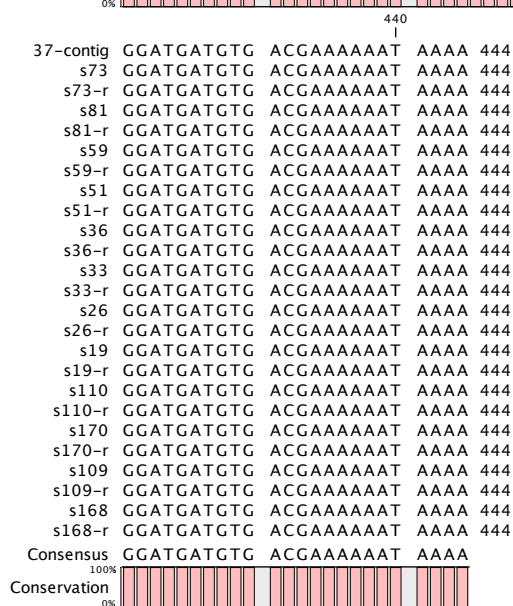

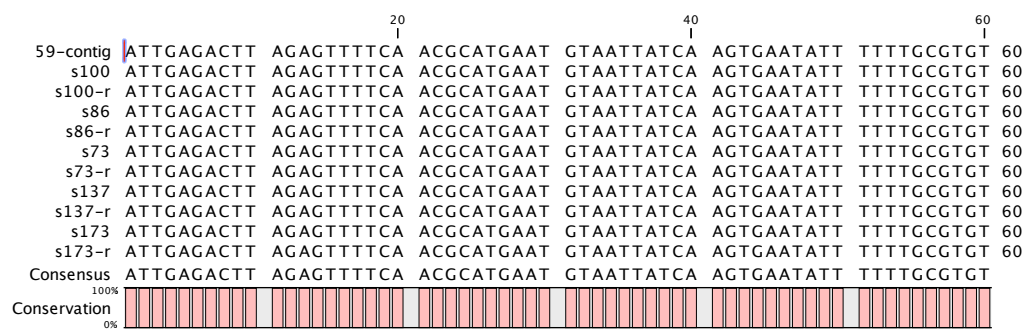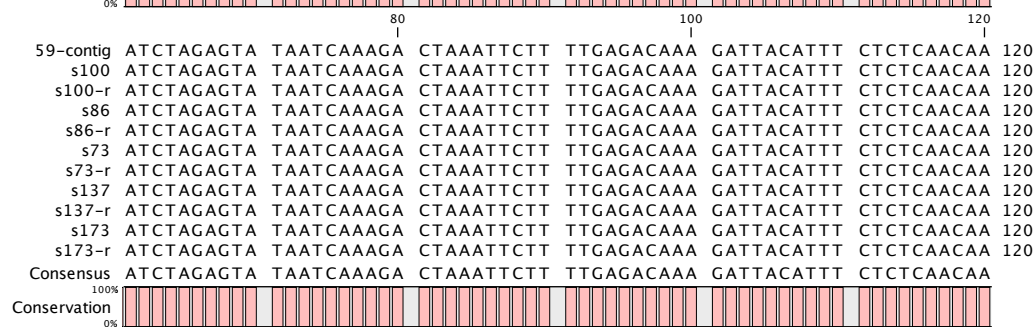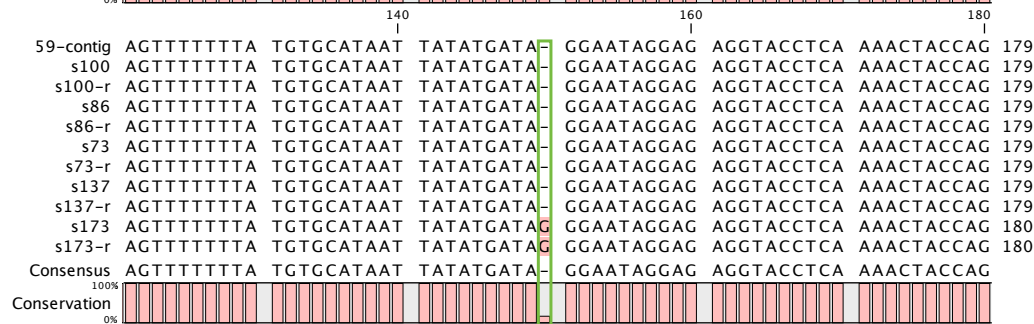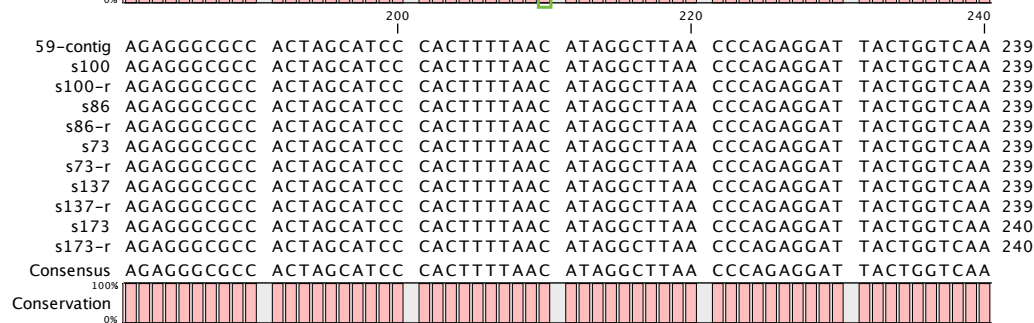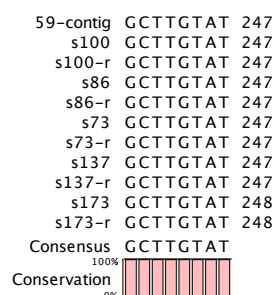

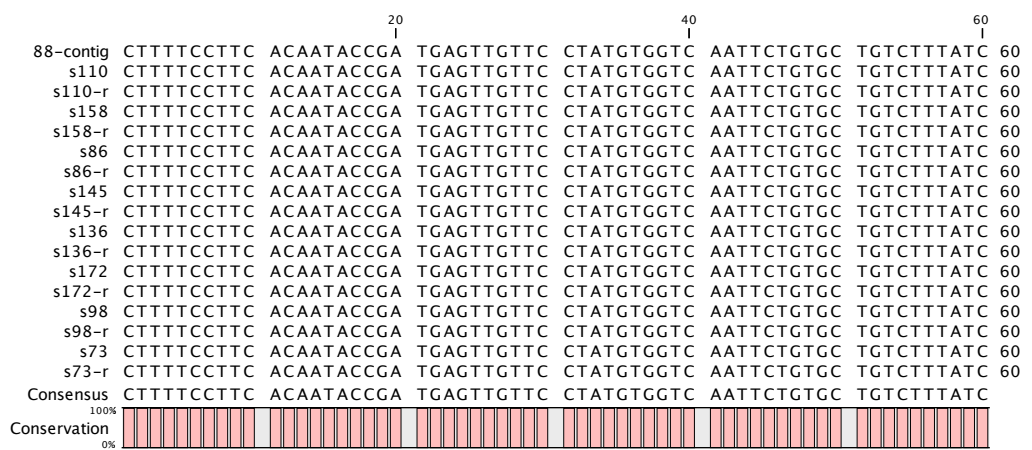

88-contig AGAGG 245  
s110 AGAGG 245  
s110-r AGAGG 245  
s158 AGAGG 245  
s158-r AGAGG 245  
s86 AGAGG 245  
s86-r AGAGG 245  
s145 AGAGG 245  
s145-r AGAGG 245  
s136 AGAGG 245  
s136-r AGAGG 245  
s172 AGAGG 245  
s172-r AGAGG 245  
s98 AGAGG 245  
s98-r AGAGG 245  
s73 AGAGG 245  
s73-r AGAGG 245

Consensus AGAGG

100%

Conservation

0%

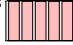



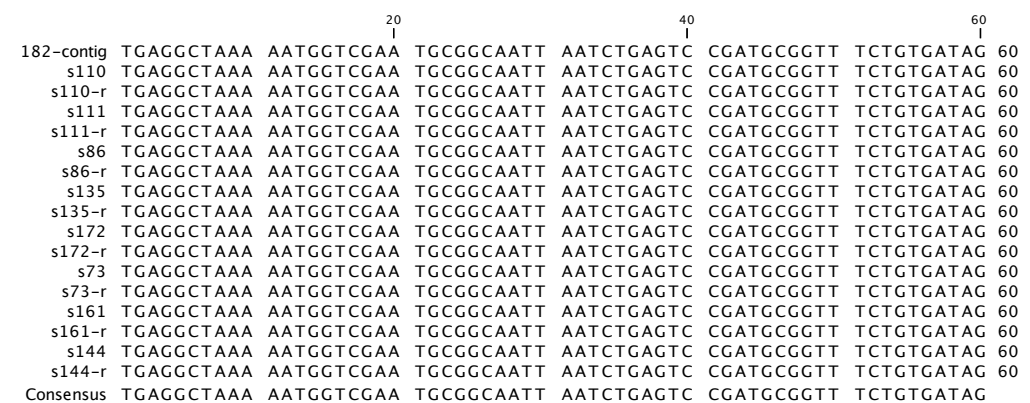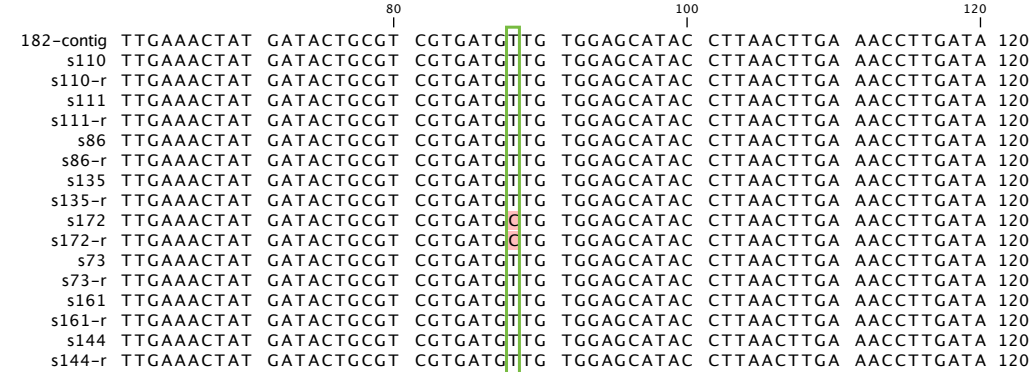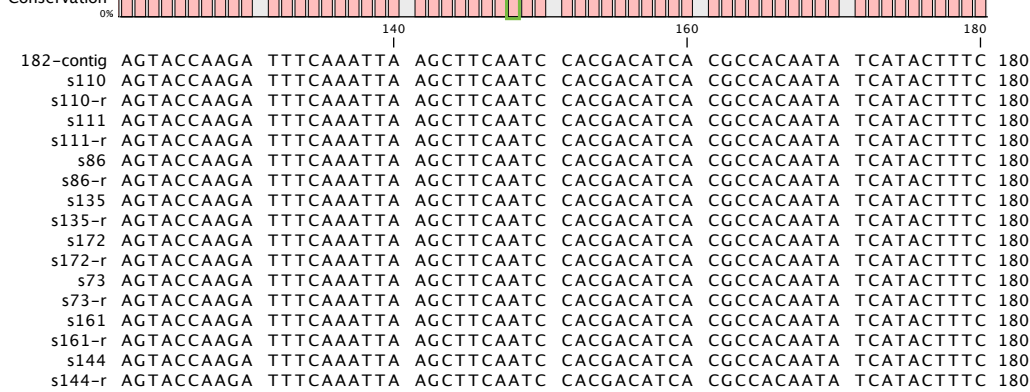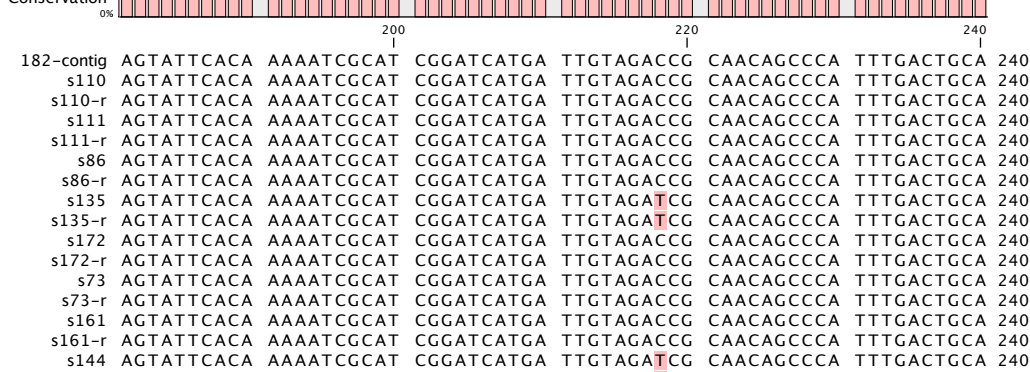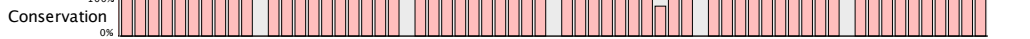

|            |            |            |            |            |            |            |     |
|------------|------------|------------|------------|------------|------------|------------|-----|
|            |            | 260        |            | 280        |            | 300        |     |
| 182-contig | TTTAACAAAA | GGGACTATAA | CAGCAGTATG | ATCACAACTG | CATTTTGCAA | CCTAGATAAG | 300 |
| s110       | TTTAACAAAA | GGGACTATAA | CAGCAGTATG | ATCACAACTG | CATTTTGCAA | CCTAGATAAG | 300 |
| s110-r     | TTTAACAAAA | GGGACTATAA | CAGCAGTATG | ATCACAACTG | CATTTTGCAA | CCTAGATAAG | 300 |
| s111       | TTTAACAAAA | GGGACTATAA | CAGCAGTATG | ATCACAACTG | CATTTTGCAA | CCTAGATAAG | 300 |
| s111-r     | TTTAACAAAA | GGGACTATAA | CAGCAGTATG | ATCACAACTG | CATTTTGCAA | CCTAGATAAG | 300 |
| s86        | TTTAACAAAA | GGGACTATAA | CAGCAGTATG | ATCACAACTG | CATTTTGCAA | CCTAGATAAG | 300 |
| s86-r      | TTTAACAAAA | GGGACTATAA | CAGCAGTATG | ATCACAACTG | CATTTTGCAA | CCTAGATAAG | 300 |
| s135       | TTTAACAAAA | GGGACTATAA | CAGCAGTATG | ATCACAACTG | CATTTTGCAA | CCTAGATAAG | 300 |
| s135-r     | TTTAACAAAA | GGGACTATAA | CAGCAGTATG | ATCACAACTG | CATTTTGCAA | CCTAGATAAG | 300 |
| s172       | TTTAACAAAA | GGGACTATAA | CAGCAGTATG | ATCACAACTG | CATTTTGCAA | CCTAGATAAG | 300 |
| s172-r     | TTTAACAAAA | GGGACTATAA | CAGCAGTATG | ATCACAACTG | CATTTTGCAA | CCTAGATAAG | 300 |
| s73        | TTTAACAAAA | GGGACTATAA | CAGCAGTATG | ATCACAACTG | CATTTTGCAA | CCTAGATAAG | 300 |
| s73-r      | TTTAACAAAA | GGGACTATAA | CAGCAGTATG | ATCACAACTG | CATTTTGCAA | CCTAGATAAG | 300 |
| s161       | TTTAACAAAA | GGGACTATAA | CAGCAGTATG | ATCACAACTG | CATTTTGCAA | CCTAGATAAG | 300 |
| s161-r     | TTTAACAAAA | GGGACTATAA | CAGCAGTATG | ATCACAACTG | CATTTTGCAA | CCTAGATAAG | 300 |
| s144       | TTTAACAAAA | GGGACTATAA | CAGCAGTATG | ATCACAACTG | CATTTTGCAA | CCTAGATAAG | 300 |
| s144-r     | TTTAACAAAA | GGGACTATAA | CAGCAGTATG | ATCACAACTG | CATTTTGCAA | CCTAGATAAG | 300 |
| Consensus  | TTTAACAAAA | GGGACTATAA | CAGCAGTATG | ATCACAACTG | CATTTTGCAA | CCTAGATAAG |     |

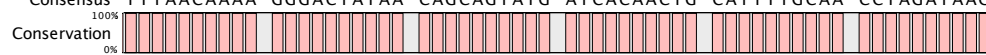

|            |            |            |            |            |            |         |
|------------|------------|------------|------------|------------|------------|---------|
|            |            | 320        |            | 340        |            |         |
| 182-contig | TACTAACTTG | CAGTTTTGCA | AGATTTACAG | CATATAAACA | TAGACAATAT | CTT 353 |
| s110       | TACTAACTTG | CAGTTTTGCA | AGATTTACAG | CATATAAACA | TAGACAATAT | CTT 353 |
| s110-r     | TACTAACTTG | CAGTTTTGCA | AGATTTACAG | CATATAAACA | TAGACAATAT | CTT 353 |
| s111       | TACTAACTTG | CAGTTTTGCA | AGATTTACAG | CATATAAACA | TAGACAATAT | CTT 353 |
| s111-r     | TACTAACTTG | CAGTTTTGCA | AGATTTACAG | CATATAAACA | TAGACAATAT | CTT 353 |
| s86        | TACTAACTTG | CAGTTTTGCA | AGATTTACAG | CATATAAACA | TAGACAATAT | CTT 353 |
| s86-r      | TACTAACTTG | CAGTTTTGCA | AGATTTACAG | CATATAAACA | TAGACAATAT | CTT 353 |
| s135       | TACTAACTTG | CAGTTTTGCA | AGATTTACAG | CATATAAACA | TAGACAATAT | CTT 353 |
| s135-r     | TACTAACTTG | CAGTTTTGCA | AGATTTACAG | CATATAAACA | TAGACAATAT | CTT 353 |
| s172       | TACTAACTTG | CAGTTTTGCA | AGATTTACAG | CATATAAACA | TAGACAATAT | CTT 353 |
| s172-r     | TACTAACTTG | CAGTTTTGCA | AGATTTACAG | CATATAAACA | TAGACAATAT | CTT 353 |
| s73        | TACTAACTTG | CAGTTTTGCA | AGATTTACAG | CATATAAACA | TAGACAATAT | CTT 353 |
| s73-r      | TACTAACTTG | CAGTTTTGCA | AGATTTACAG | CATATAAACA | TAGACAATAT | CTT 353 |
| s161       | TACTAACTTG | CAGTTTTGCA | AGATTTACAG | CATATAAACA | TAGACAATAT | CTT 353 |
| s161-r     | TACTAACTTG | CAGTTTTGCA | AGATTTACAG | CATATAAACA | TAGACAATAT | CTT 353 |
| s144       | TACTAACTTG | CAGTTTTGCA | AGATTTACAG | CATATAAACA | TAGACAATAT | CTT 353 |
| s144-r     | TACTAACTTG | CAGTTTTGCA | AGATTTACAG | CATATAAACA | TAGACAATAT | CTT 353 |
| Consensus  | TACTAACTTG | CAGTTTTGCA | AGATTTACAG | CATATAAACA | TAGACAATAT | CTT     |

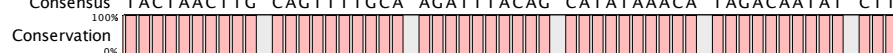

20 40 60  
188-contig ATTATTCTTT TAACAAACAA AAAAGGTTTT TGTCAATTCGG CTAAAAATTT GACATTATTT 60  
s36 ATTATTCTTT TAACAAACAA AAAAGGTTTT TGTCAATTCGG CTAAAAATTT GACATTATTT 60  
s36-r ATTATTCTTT TAACAAACAA AAAAGGTTTT TGTCAATTCGG CTAAAAATTT GACATTATTT 60  
s23 ATTATTCTTT TAACAAACAA AAAAGGTTTT TGTCAATTCGG CTAAAAATTT GACATTATTT 60  
s23-r ATTATTCTTT TAACAAACAA AAAAGGTTTT TGTCAATTCGG CTAAAAATTT GACATTATTT 60  
s189 ATTATTCTTT TAACAAACAA AAAAGGTTTT TGTCAATTCGG CTAAAAATTT GACATTATTT 60  
s18p-r ATTATTCTTT TAACAAACAA AAAAGGTTTT TGTCAATTCGG CTAAAAATTT GACATTATTT 60  
s110 ATTATTCTTT TAACAAACAA AAAAGGTTTT TGTCAATTCGG CTAAAAATTT GACATTATTT 60  
s110-r ATTATTCTTT TAACAAACAA AAAAGGTTTT TGTCAATTCGG CTAAAAATTT GACATTATTT 60  
Consensus ATTATTCTTT TAACAAACAA AAAAGGTTTT TGTCAATTCGG CTAAAAATTT GACATTATTT

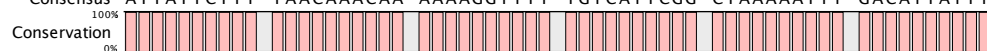

80 100 120  
188-contig CAAAAAGTTT CAAAATCACT TTTCACAAC TTAATTATC TTAAAAATCG TTTTGTGACAG 120  
s36 CAAAAAGTTT CAAAATCACT TTTCACAAC TTAATTATC TTAAAAATCG TTTTGTGACAG 120  
s36-r CAAAAAGTTT CAAAATCACT TTTCACAAC TTAATTATC TTAAAAATCG TTTTGTGACAG 120  
s23 CAAAAAGTTT CAAAATCACT TTTCACAAC TTAATTATC TTAAAAATCG TTTTGTGACAG 120  
s23-r CAAAAAGTTT CAAAATCACT TTTCACAAC TTAATTATC TTAAAAATCG TTTTGTGACAG 120  
s189 CAAAAAGTTT CAAAATCACT TTTCACAAC TTAATTATC TTAAAAATCG TTTTGTGACAG 120  
s18p-r CAAAAAGTTT CAAAATCACT TTTCACAAC TTAATTATC TTAAAAATCG TTTTGTGACAG 120  
s110 CAAAAAGTTT CAAAATCACT TTTCACAAC TTAATTATC TTAAAAATCG TTTTGTGACAG 120  
s110-r CAAAAAGTTT CAAAATCACT TTTCACAAC TTAATTATC TTAAAAATCG TTTTGTGACAG 120  
Consensus CAAAAAGTTT CAAAATCACT TTTCACAAC TTAATTATC TTAAAAATCG TTTTGTGACAG

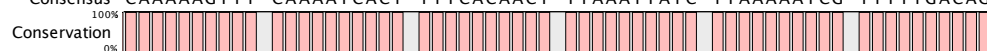

140 160 180  
188-contig CAAATATATC CAAACCAAAA TTAAATAAGT ATTAGACAAT CAATTTTTTT CATAGCTTAT 180  
s36 CAAATATATC CAAACCAAAA TTAAATAAGT ATTAGACAAT CAATTTTTTT CATAGCTTAT 180  
s36-r CAAATATATC CAAACCAAAA TTAAATAAGT ATTAGACAAT CAATTTTTTT CATAGCTTAT 180  
s23 CAAATATATC CAAACCAAAA TTAAATAAGT ATTAGACAAT CAATTTTTTT CATAGCTTAT 180  
s23-r CAAATATATC CAAACCAAAA TTAAATAAGT ATTAGACAAT CAATTTTTTT CATAGCTTAT 180  
s189 CAAATATATC CAAACCAAAA TTAAATAAGT ATTAGACAAT CAATTTTTTT CATAGCTTAT 180  
s18p-r CAAATATATC CAAACCAAAA TTAAATAAGT ATTAGACAAT CAATTTTTTT CATAGCTTAT 180  
s110 CAAATATATC CAAACCAAAA TTAAATAAGT ATTAGACAAT CAATTTTTTT CATAGCTTAT 180  
s110-r CAAATATATC CAAACCAAAA TTAAATAAGT ATTAGACAAT CAATTTTTTT CATAGCTTAT 180  
Consensus CAAATATATC CAAACCAAAA TTAAATAAGT ATTAGACAAT CAATTTTTTT CATAGCTTAT

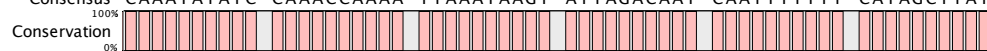

200 220 240  
188-contig TTTCACAATT AATTTTACAC ACTCTAAAAA AACTTTTTTA AAAGCTTAAA TTTGACTTAT 240  
s36 TTTCACAATT AATTTTACAC ACTCTAAAAA AACTTTTTTA AAAGCTTAAA TTTGACTTAT 240  
s36-r TTTCACAATT AATTTTACAC ACTCTAAAAA AACTTTTTTA AAAGCTTAAA TTTGACTTAT 240  
s23 TTTCACAATT AATTTTACAC ACTCTAAAAA AACTTTTTTA AAAGCTTAAA TTTGACTTAT 240  
s23-r TTTCACAATT AATTTTACAC ACTCTAAAAA AACTTTTTTA AAAGCTTAAA TTTGACTTAT 240  
s189 TTTCACAATT AATTTTACAC ACTCTAAAAA AACTTTTTTA AAAGCTTAAA TTTGACTTAT 240  
s18p-r TTTCACAATT AATTTTACAC ACTCTAAAAA AACTTTTTTA AAAGCTTAAA TTTGACTTAT 240  
s110 TTTCACAATT AATTTTACAC ACTCTAAAAA AACTTTTTTA AAAGCTTAAA TTTGACTTAT 240  
s110-r TTTCACAATT AATTTTACAC ACTCTAAAAA AACTTTTTTA AAAGCTTAAA TTTGACTTAT 240  
Consensus TTTCACAATT AATTTTACAC ACTCTAAAAA AACTTTTTTA AAAGCTTAAA TTTGACTTAT

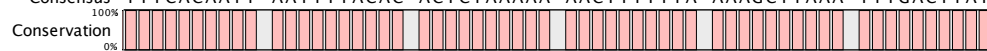

260 280 300  
188-contig TAATATAAAA ACCAGACTAA ACTTTAAATA GGTCAAGCCA CAGATAGTTG ACAACCACCT 300  
s36 TAATATAAAA ACCAGACTAA ACTTTAAATA GGTCAAGCCA CAGACAGTTG ACAACCACCT 300  
s36-r TAATATAAAA ACCAGACTAA ACTTTAAATA GGTCAAGCCA CAGACAGTTG ACAACCACCT 300  
s23 TAATATAAAA ACCAGACTAA ACTTTAAATA GGTCAAGCCA CAGATAGTTG ACAACCACCT 300  
s23-r TAATATAAAA ACCAGACTAA ACTTTAAATA GGTCAAGCCA CAGATAGTTG ACAACCACCT 300  
s189 TAATATAAAA ACCAGACTAA ACTTTAAATA GGTCAAGCCA CAGATAGTTG ACAACCACCT 300  
s18p-r TAATATAAAA ACCAGACTAA ACTTTAAATA GGTCAAGCCA CAGATAGTTG ACAACCACCT 300  
s110 TAATATAAAA ACCAGACTAA ACTTTAAATA GGTCAAGCCA CAGACAGTTG ACAACCACCT 300  
s110-r TAATATAAAA ACCAGACTAA ACTTTAAATA GGTCAAGCCA CAGACAGTTG ACAACCACCT 300  
Consensus TAATATAAAA ACCAGACTAA ACTTTAAATA GGTCAAGCCA CAGATAGTTG ACAACCACCT

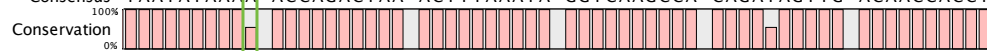

320 340 360  
188-contig AACCTATTCC CACCCGAATT TCGAGTCACA AGCAAAATGA AATAGGGTGT ATATGAGCCA 360  
s36 AACCTATTCC CACCCGTATT TCGAGTCACA AGCAAAATGA AATAGGGTGT ATATGAGCCA 360  
s36-r AACCTATTCC CACCCGTATT TCGAGTCACA AGCAAAATGA AATAGGGTGT ATATGAGCCA 360  
s23 AACCTATTCC CACCCGAATT TCGAGTCACA AGCAAAATGA AATAGGGTGT ATATGAGCCA 360  
s23-r AACCTATTCC CACCCGAATT TCGAGTCACA AGCAAAATGA AATAGGGTGT ATATGAGCCA 360  
s189 AACCTATTCC CACCCGAATT TCGAGTCACA AGCAAAATGA AATAGGGTGT ATATGAGCCA 360  
s18p-r AACCTATTCC CACCCGTATT TCGAGTCACA AGCAAAATGA AATAGGGTGT ATATGAGCCA 360  
s110 AACCTATTCC CACCCGTATT TCGAGTCACA AGCAAAATGA AATAGGGTGT ATATGAGCCA 360  
s110-r AACCTATTCC CACCCGTATT TCGAGTCACA AGCAAAATGA AATAGGGTGT ATATGAGCCA 360  
Consensus AACCTATTCC CACCCGAATT TCGAGTCACA AGCAAAATGA AATAGGGTGT ATATGAGCCA

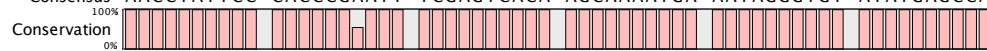

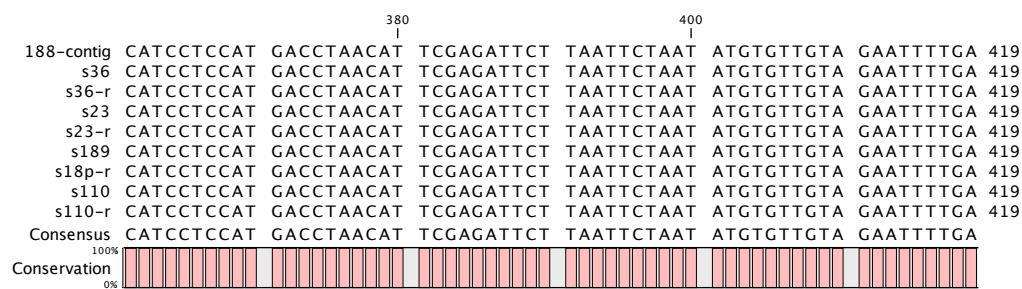



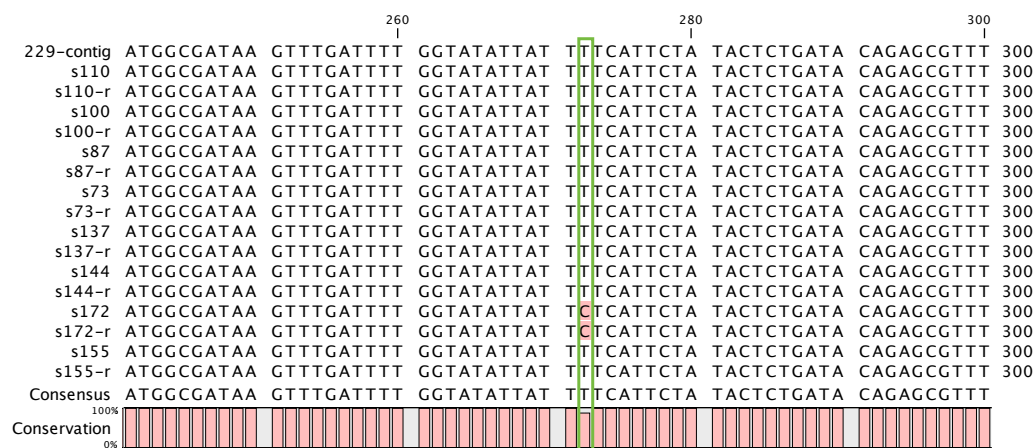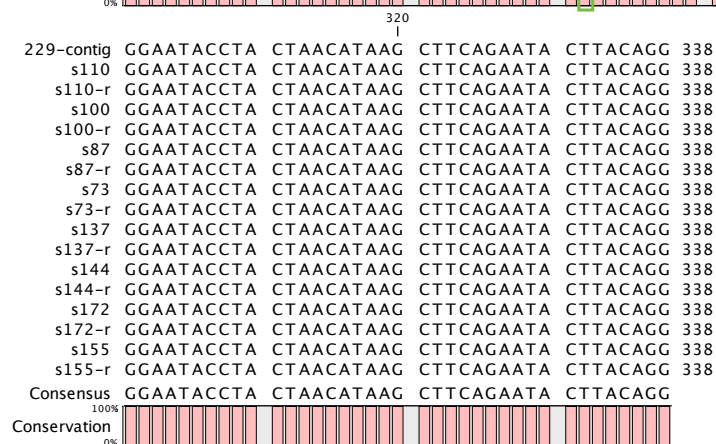

Supplement: s1 [file s1]
