# Supplementary figures and images for: Development of SNP Set for the Marker-Assisted Selection of Guar (Cyamopsis tetragonoloba (L.) Taub.) Based on a Custom Reference Genome Assembly
Source: MDPI journal article supplement (doi:10.3390/plants10102063), 2021-09-30

**a**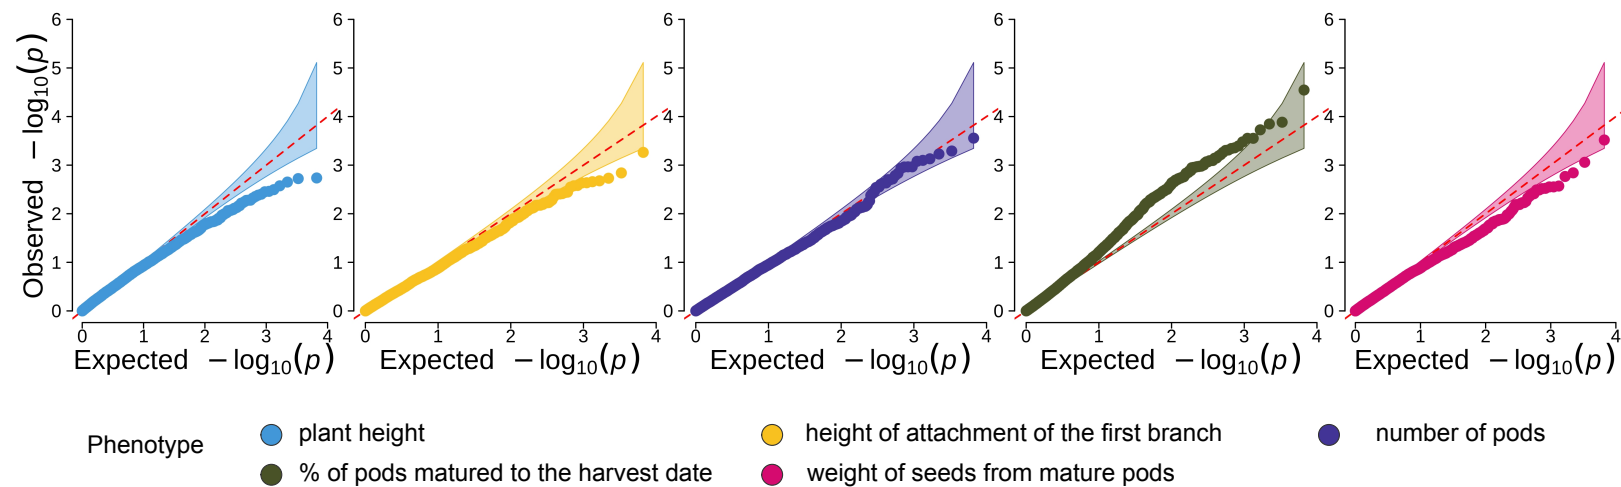**b**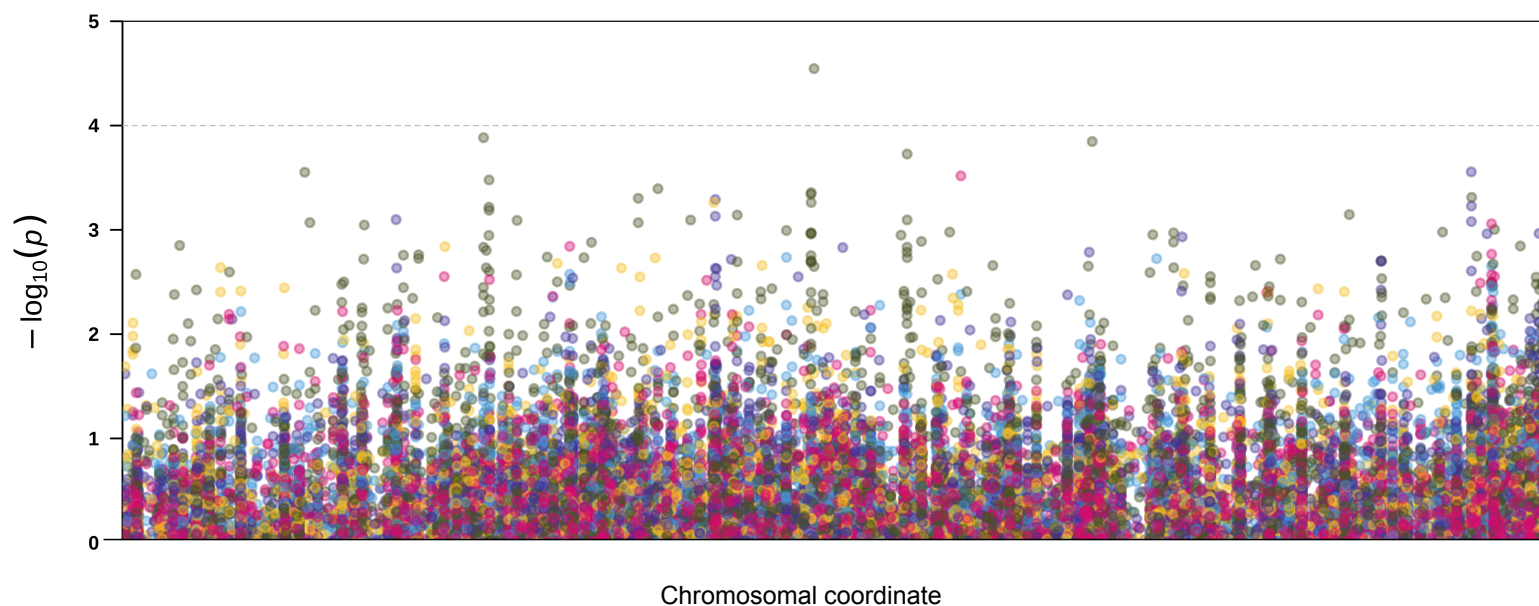

Supplement: s1 [file s1]

**a**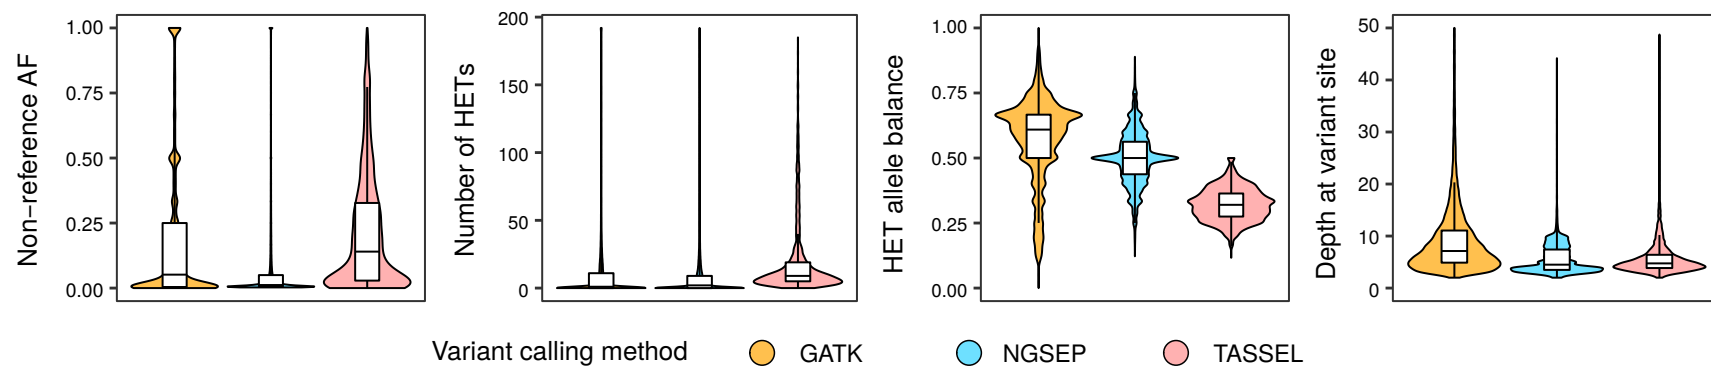**b**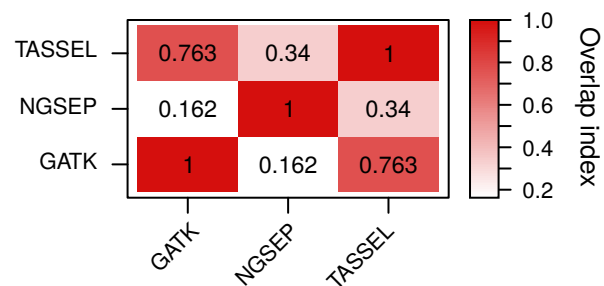**c**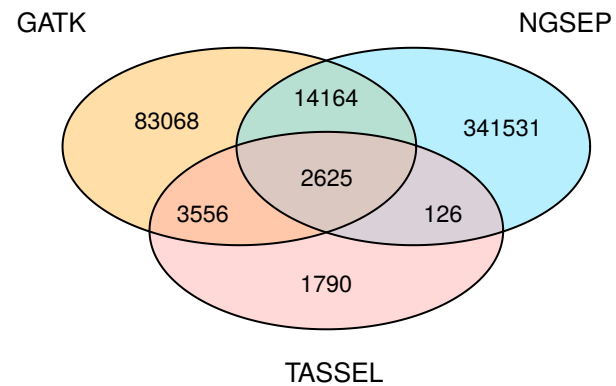

Supplement: s1 [file s1]

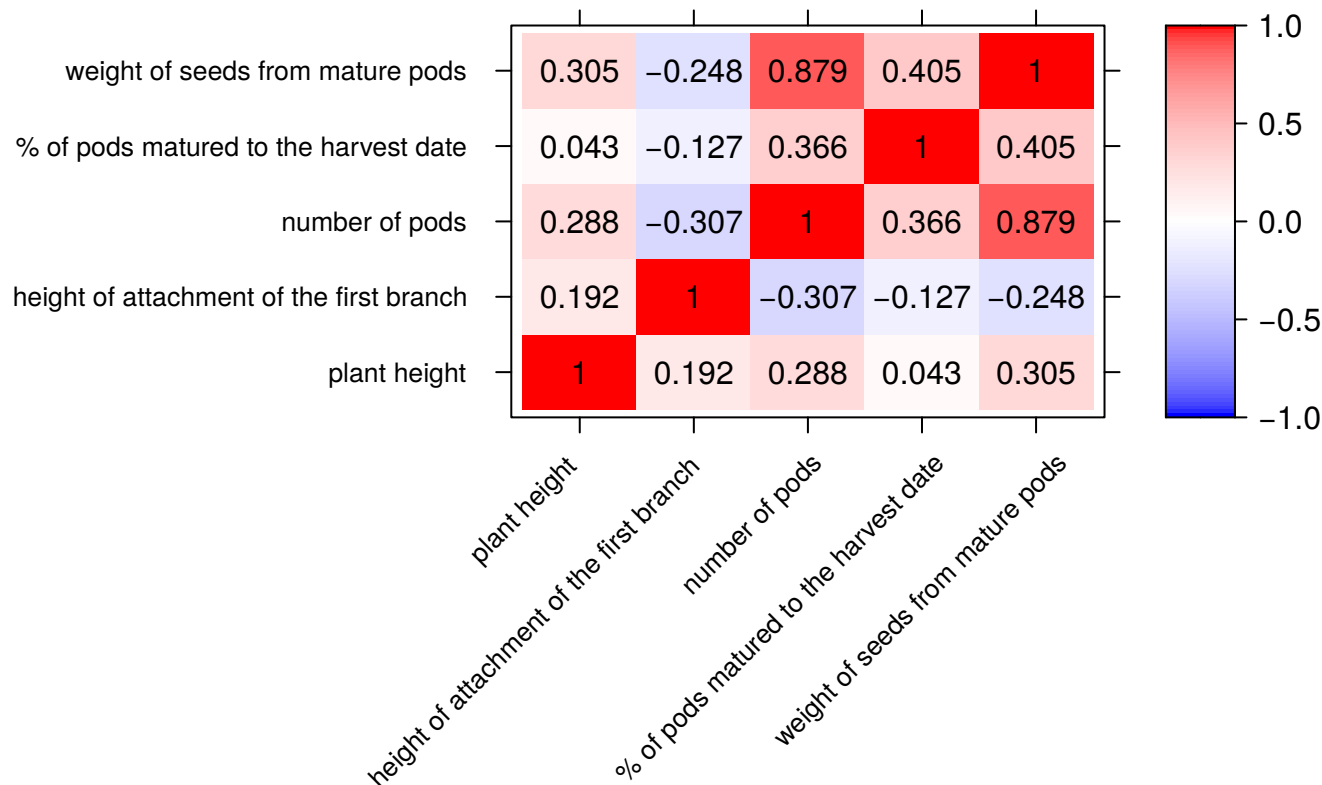

Supplement: s1 [file s1]
